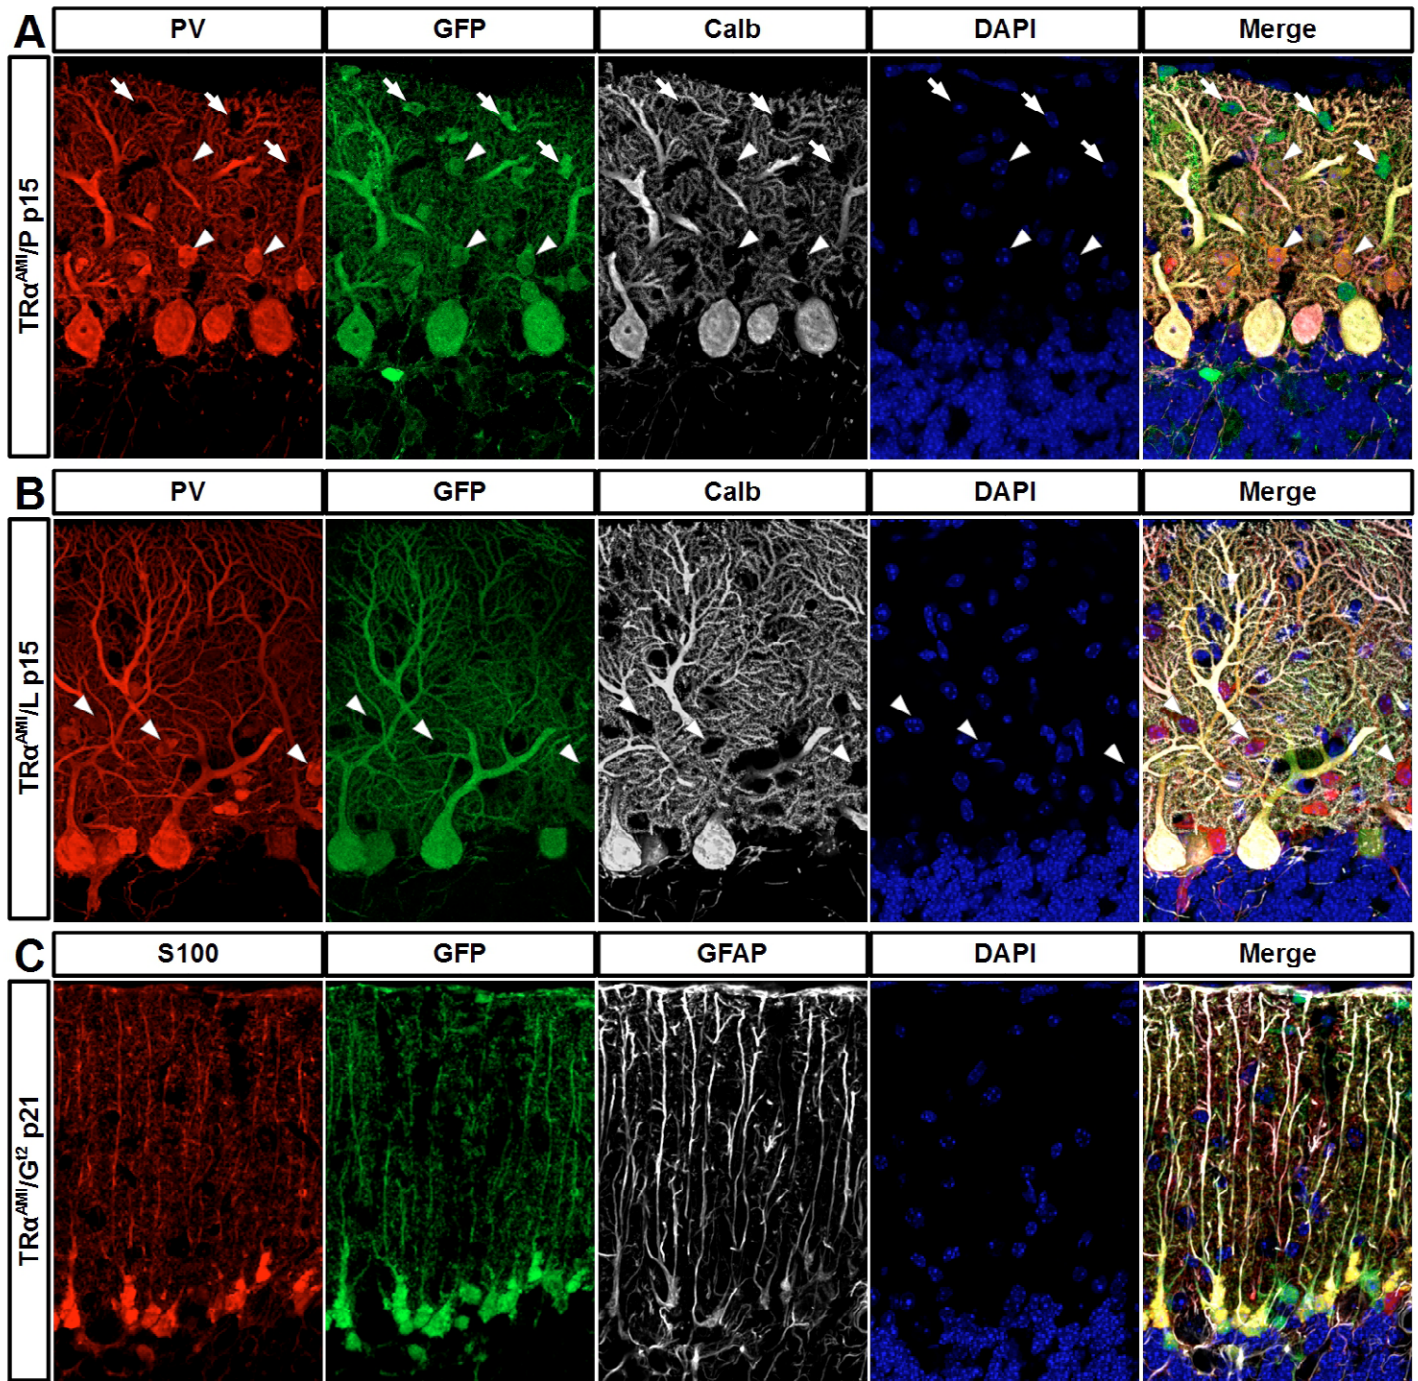

### CRE-mediated recombination in different transgenic line.

A) In TR $\alpha^{AM1}/P$  mice, YFP expression (anti-GFP immunostaining) is detected in Purkinje cells (calbindin and parvalbumin positives), mature (parvalbumin positive, arrowheads) and immature (parvalbumin negative, arrows) interneurons.

B) In TR $\alpha^{AM1}/L$  mice, YFP expression is restricted to Purkinje cells, and is not detected in interneurons (arrowheads).

C) In Tr $\alpha^{AM1}/G^{t2}$ , a single tamoxifen injection at birth efficiently triggers recombination in Bergmann glia.

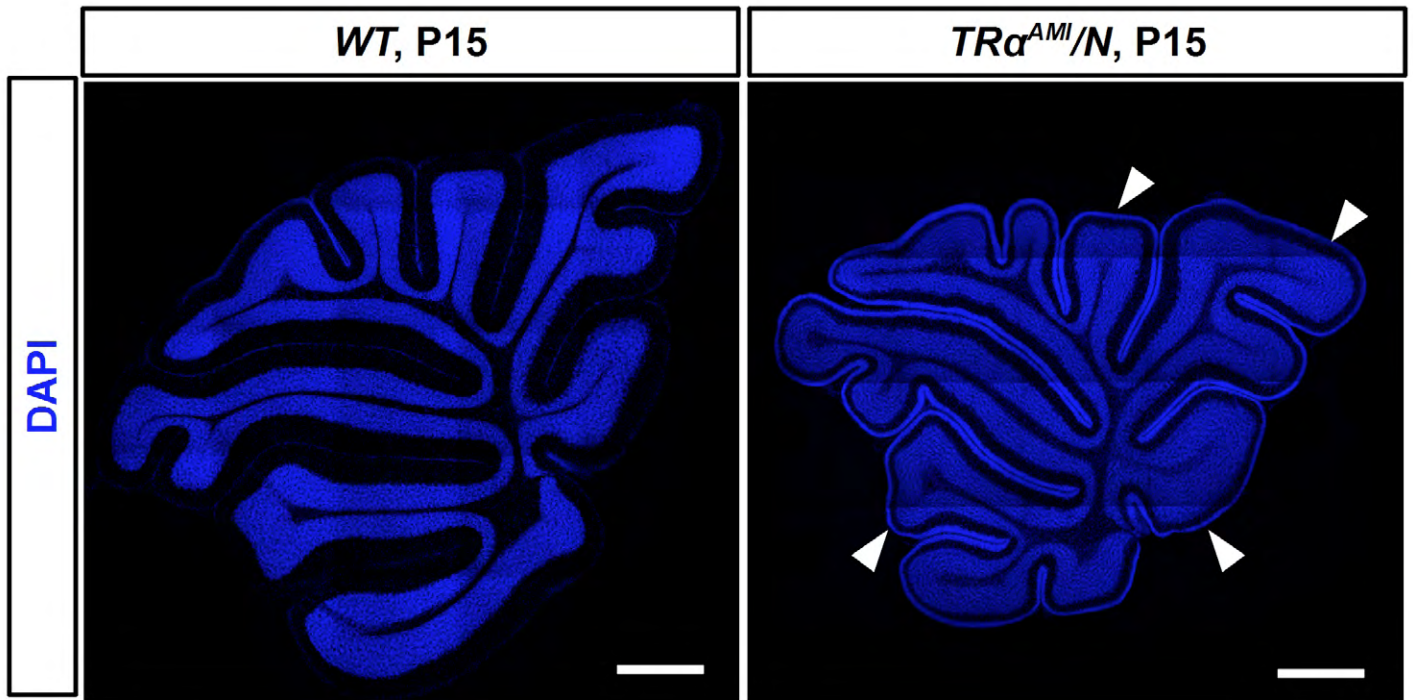

### EGL thickening

Ubiquitous  $TR\alpha^{L400R}$  expression ( $TR\alpha^{AM1/N}$ , right panel) leads to a thickening of the EGL (arrowhead) compared to WT animal (left panel). This thickening is observed in the entire cerebellum. Scalebar : 500 $\mu$ m
